# Supplementary material for: Metabarcoding Analyses of Gut Microbiota of Nile Tilapia (Oreochromis niloticus) from Lake Awassa and Lake Chamo, Ethiopia
Source: PubMed Central journal article supplement (PMC7409238; doi:10.3390/microorganisms8071040), 2020-07-13
Supplement: microorganisms-08-01040-s001.pdf [file microorganisms-08-01040-s001.pdf]

## Supplementary materials

### Actinobacteria

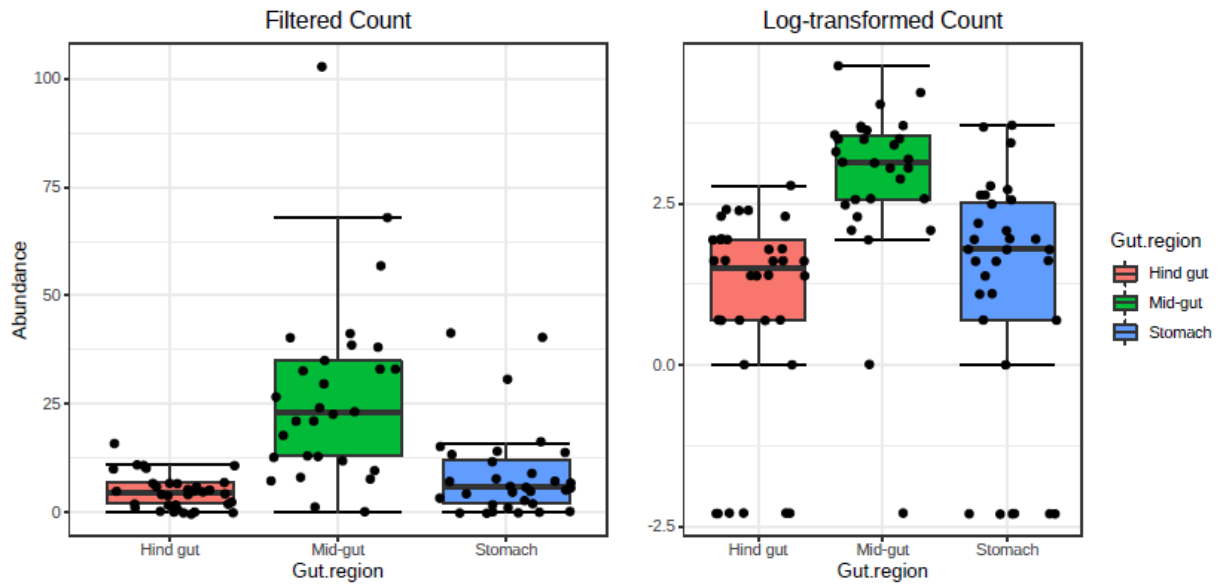

### Chloroflexi

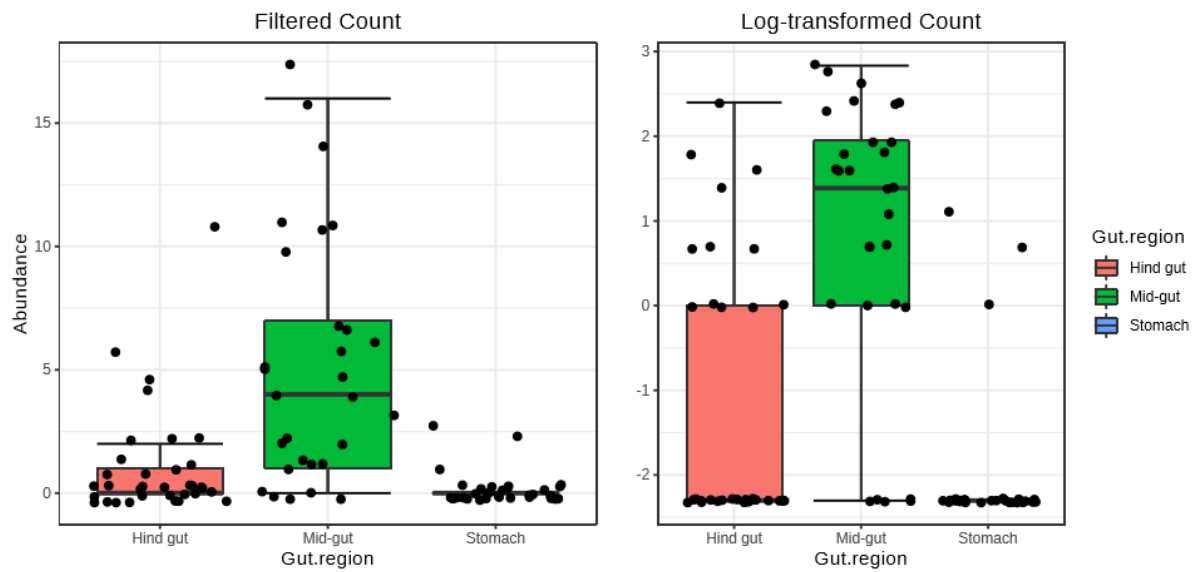

### Bacteroidetes

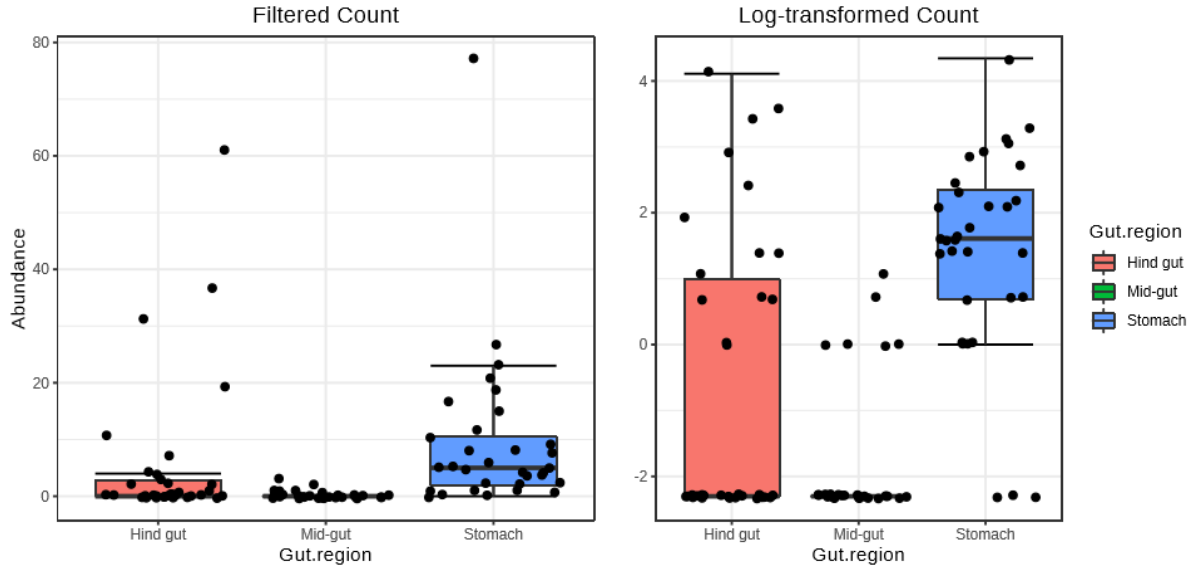

### Firmicutes

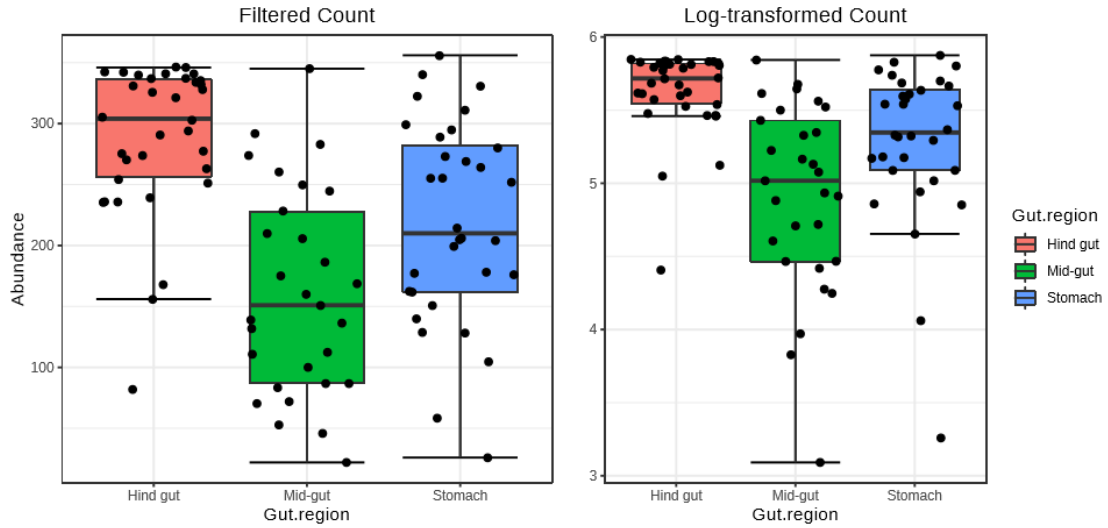

### Proteobacteria

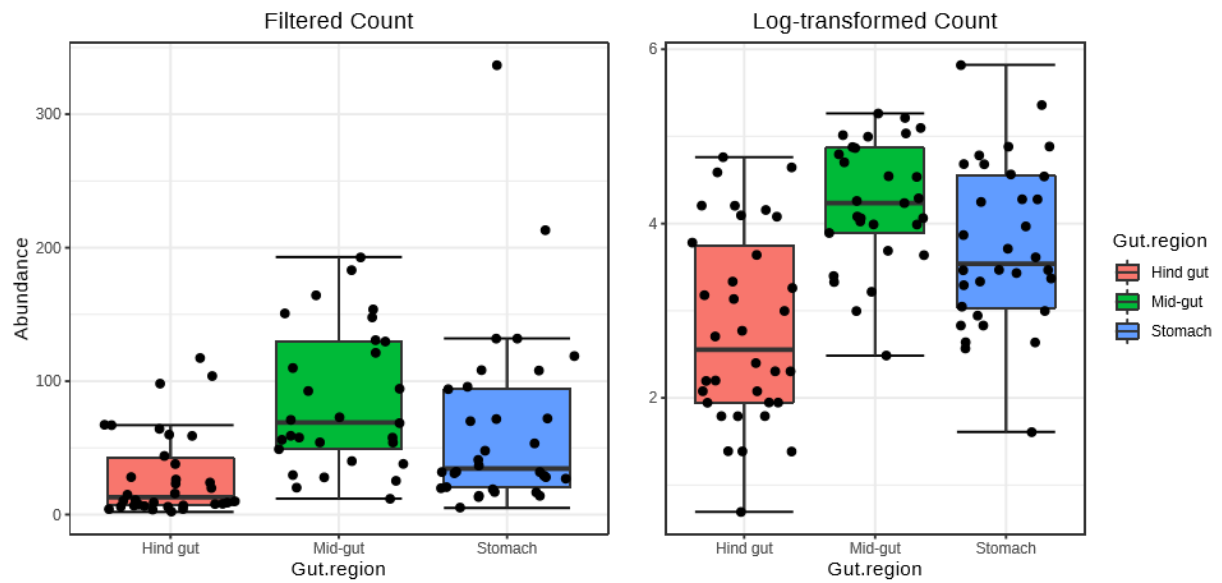

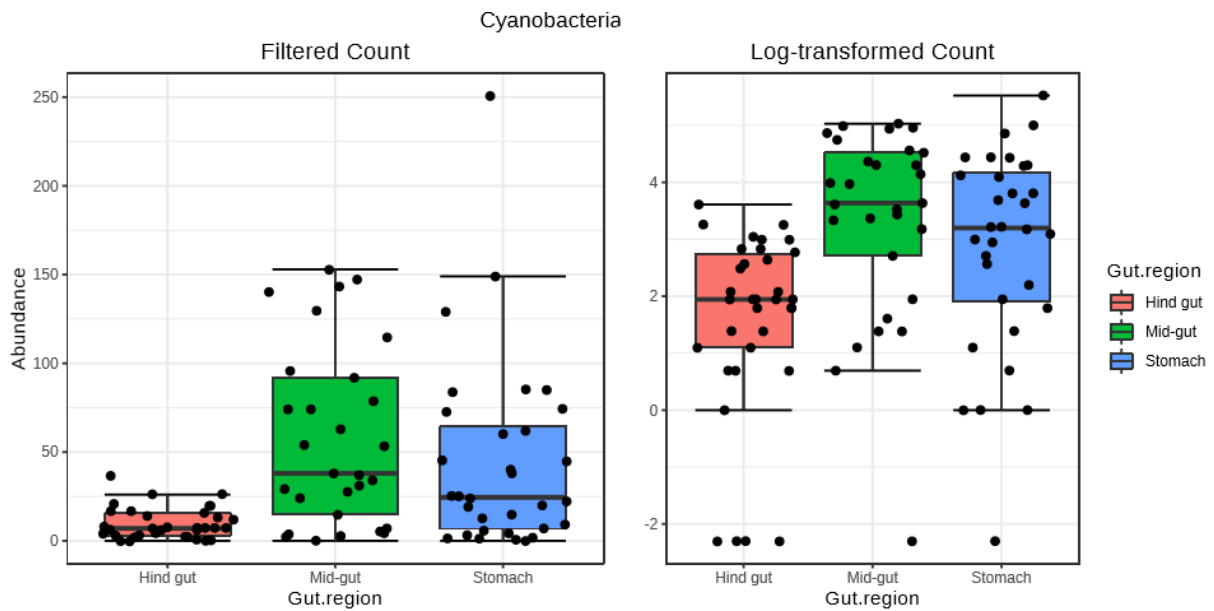

**Supplementary figure1.** Differential abundance analysis of some phyla.

**Supplementary Table 1.** Bacterial genus significantly different between lake Awassa and Chamo.

| Genus                                | Pvalues  | FDR      | Statistics |
|--------------------------------------|----------|----------|------------|
| Romboutsia                           | 3.58E-13 | 1.50E-11 | 155.5      |
| Orientia                             | 1.40E-12 | 2.95E-11 | 1925       |
| Gp11a                                | 2.37E-12 | 3.32E-11 | 1957.5     |
| Candidatus_Carsonella                | 4.28E-12 | 4.49E-11 | 1959.5     |
| Aquihabitans                         | 2.56E-10 | 2.15E-09 | 1800       |
| Bacillus                             | 1.78E-09 | 1.17E-08 | 326.5      |
| Methyloparacoccus                    | 1.94E-09 | 1.17E-08 | 348        |
| Gemmobacter                          | 2.99E-09 | 1.57E-08 | 461.5      |
| Sporolactobacillaceae_incertae_sedis | 5.38E-09 | 2.51E-08 | 495        |
| Nocardioides                         | 2.88E-08 | 1.21E-07 | 540        |
| Cetobacterium                        | 3.31E-08 | 1.26E-07 | 384        |
| Lysinibacillus                       | 3.79E-08 | 1.33E-07 | 530.5      |
| Mycobacterium                        | 1.43E-07 | 4.62E-07 | 1805.5     |
| Oceanicola                           | 2.89E-07 | 8.11E-07 | 607.5      |
| Enhygromyxa                          | 2.90E-07 | 8.11E-07 | 607.5      |
| Micromonospora                       | 8.20E-07 | 2.15E-06 | 599.5      |
| Rhodobacter                          | 9.42E-07 | 2.33E-06 | 622.5      |
| Terrisporobacter                     | 1.87E-06 | 4.36E-06 | 552        |
| Rhodoplanes                          | 2.57E-06 | 5.69E-06 | 675        |
| Povalibacter                         | 1.89E-05 | 3.96E-05 | 680        |
| Bacillariophyta                      | 3.07E-05 | 6.14E-05 | 1683       |
| Daeguia                              | 0.000147 | 0.000281 | 631.5      |
| Clostridium_sensu_stricto            | 0.000318 | 0.000561 | 1608.5     |
| Chlorophyta                          | 0.00032  | 0.000561 | 1545       |
| Aggregicoccus                        | 0.000499 | 0.000839 | 1525.5     |
| Olsenella                            | 0.001355 | 0.002189 | 807        |
| Ralstonia                            | 0.001579 | 0.002456 | 1466.5     |

|                  |          |          |        |
|------------------|----------|----------|--------|
| Flexithrix       | 0.003996 | 0.005994 | 1456.5 |
| Cellulosilyticum | 0.00662  | 0.009588 | 821.5  |
| Turicibacter     | 0.01242  | 0.017388 | 1460.5 |
| Paludibacter     | 0.013698 | 0.018559 | 865    |
| GpXI             | 0.017986 | 0.023607 | 1439.5 |
| Methylocystis    | 0.032206 | 0.04099  | 868.5  |
| Rubrivivax       | 0.036066 | 0.044552 | 904    |

**Supplementary table 2.** Bacterial genus significantly different between the gut regions.

| Genus                                | Pvalues  | FDR      | Statistics |
|--------------------------------------|----------|----------|------------|
| Roseomonas                           | 4.66E-12 | 1.96E-10 | 52.186     |
| Aciditerrimonas                      | 5.12E-11 | 1.08E-09 | 47.391     |
| Clostridium_XI                       | 6.32E-10 | 8.84E-09 | 42.365     |
| Litorilinea                          | 3.15E-09 | 3.31E-08 | 39.15      |
| Clostridium_sensu_stricto            | 4.97E-08 | 4.17E-07 | 33.635     |
| Daeguia                              | 1.47E-07 | 1.02E-06 | 31.47      |
| Flexithrix                           | 1.71E-07 | 1.02E-06 | 31.166     |
| Aggregicoccus                        | 1.72E-06 | 9.04E-06 | 26.543     |
| Bacillariophyta                      | 2.56E-06 | 1.20E-05 | 25.749     |
| Methylocystis                        | 2.85E-06 | 1.20E-05 | 25.535     |
| Mycobacterium                        | 3.64E-06 | 1.39E-05 | 25.048     |
| Terrisporobacter                     | 8.61E-06 | 3.01E-05 | 23.325     |
| Rubrivivax                           | 1.49E-05 | 4.80E-05 | 22.235     |
| Motilibacter                         | 3.40E-05 | 0.000101 | 20.58      |
| Thiolamprovm                         | 3.59E-05 | 0.000101 | 20.469     |
| Aquihabitans                         | 0.000101 | 0.000264 | 18.409     |
| Bacillus                             | 0.000112 | 0.000276 | 18.196     |
| Cellulosilyticum                     | 0.000149 | 0.000344 | 17.619     |
| Hyphomicrobium                       | 0.000156 | 0.000344 | 17.536     |
| GpXI                                 | 0.001019 | 0.00214  | 13.778     |
| Enhygromyxa                          | 0.001191 | 0.002382 | 13.466     |
| Rhodoplanes                          | 0.001359 | 0.002594 | 13.202     |
| Povalibacter                         | 0.002207 | 0.00403  | 12.233     |
| Gemmobacter                          | 0.00241  | 0.004217 | 12.056     |
| Methyloparacoccus                    | 0.004406 | 0.007402 | 10.85      |
| Sporolactobacillaceae_incertae_sedis | 0.006716 | 0.010849 | 10.007     |
| Candidatus_Carsonella                | 0.00882  | 0.013719 | 9.4616     |
| Paludibacter                         | 0.010146 | 0.015219 | 9.1814     |
| Turicibacter                         | 0.01152  | 0.016684 | 8.9274     |
| Olsenella                            | 0.01353  | 0.018705 | 8.6056     |
| Lysinibacillus                       | 0.013806 | 0.018705 | 8.5653     |
| Chlorophyta                          | 0.03111  | 0.040831 | 6.9405     |
| Romboutsia                           | 0.033325 | 0.042413 | 6.8029     |
| Ralstonia                            | 0.037524 | 0.046353 | 6.5655     |
| Orientia                             | 0.039062 | 0.046522 | 6.4852     |
| Oceanicola                           | 0.039876 | 0.046522 | 6.444      |

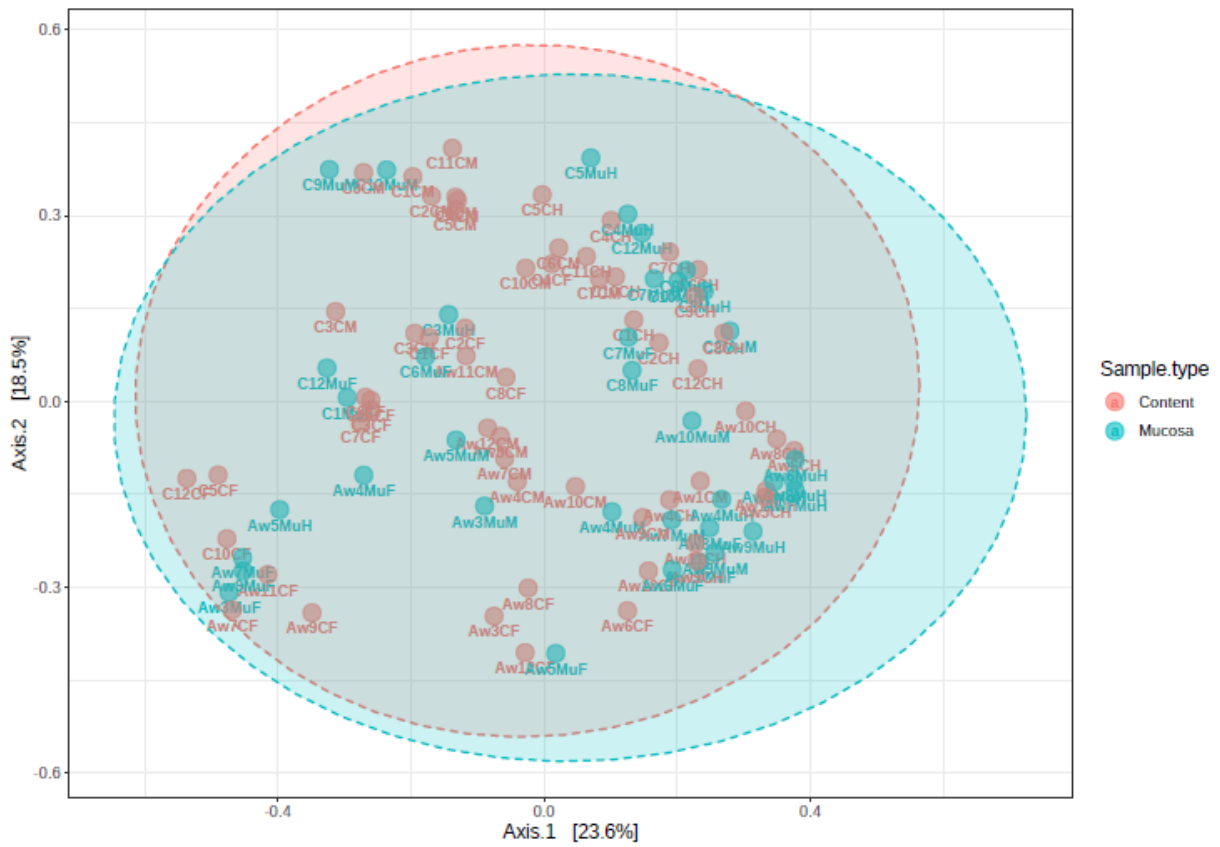

**Supplementary figure 2:** Principal coordinate analysis (PCoA) plot of all samples between intestinal content and mucosa. Each dot represents one sample.

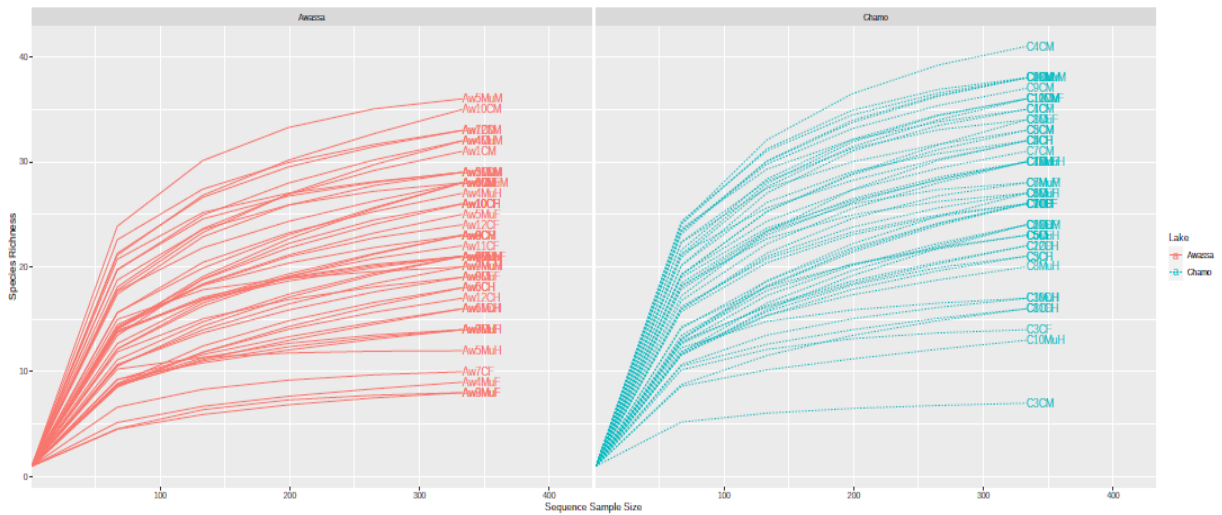

**Supplementary figure 3:** Rarefaction curve

**Supplementary table 3: Goods coverage**

| Sample  | Goods    | Sample | Goods    |
|---------|----------|--------|----------|
| Aw10CF  | 96.75676 | C10MuH | 99.18919 |
| Aw10CH  | 98.64865 | C11CF  | 97.2973  |
| Aw10CM  | 97.56757 | C11CH  | 99.18919 |
| Aw10MuF | 98.91892 | C11CM  | 97.2973  |
| Aw10MuM | 99.18919 | C12CF  | 98.10811 |
| Aw11CF  | 98.37838 | C12CH  | 99.18919 |
| Aw11CH  | 98.37838 | C12MuF | 98.91892 |
| Aw11CM  | 98.91892 | C12MuH | 98.10811 |
| Aw12CF  | 98.64865 | C12MuM | 98.37838 |
| Aw12CH  | 97.56757 | C1CF   | 99.45946 |
| Aw12CM  | 98.10811 | C1CH   | 98.91892 |
| Aw1CM   | 97.83784 | C1CM   | 98.91892 |
| Aw3CF   | 98.10811 | C1MuF  | 97.83784 |
| Aw3MuF  | 99.45946 | C2CF   | 98.64865 |
| Aw3MuH  | 98.37838 | C2CH   | 98.64865 |
| Aw3MuM  | 99.18919 | C2CM   | 98.37838 |
| Aw4CH   | 97.56757 | C2MuM  | 97.2973  |
| Aw4CM   | 98.37838 | C3CF   | 98.64865 |
| Aw4MuF  | 98.91892 | C3CH   | 98.64865 |
| Aw4MuH  | 98.37838 | C3CM   | 99.45946 |
| Aw4MuM  | 98.10811 | C3MuH  | 99.45946 |
| Aw5CH   | 98.10811 | C4CF   | 98.37838 |
| Aw5CM   | 99.18919 | C4CH   | 97.02703 |
| Aw5MuF  | 98.10811 | C4CM   | 98.91892 |
| Aw5MuH  | 100      | C4MuH  | 97.56757 |
| Aw5MuM  | 98.37838 | C5CF   | 98.64865 |
| Aw6CF   | 98.91892 | C5CH   | 97.83784 |
| Aw6CH   | 98.64865 | C5CM   | 99.18919 |

---

|        |          |       |          |
|--------|----------|-------|----------|
| Aw6MuF | 98.10811 | C5MuH | 98.10811 |
| Aw6MuH | 99.45946 | C6CF  | 98.10811 |
| Aw7CF  | 99.18919 | C6CH  | 97.2973  |
| Aw7CM  | 98.37838 | C6CM  | 98.91892 |
| Aw7MuF | 98.37838 | C6MuF | 97.56757 |
| Aw7MuH | 98.10811 | C6MuH | 98.37838 |
| Aw7MuM | 99.72973 | C7CF  | 99.45946 |
| Aw8CF  | 97.83784 | C7CH  | 98.64865 |
| Aw8CH  | 97.83784 | C7CM  | 98.91892 |
| Aw8MuF | 98.64865 | C7MuF | 97.83784 |
| Aw8MuH | 97.83784 | C7MuM | 98.64865 |
| Aw9CF  | 99.18919 | C8CF  | 98.91892 |
| Aw9CH  | 98.91892 | C8CH  | 97.83784 |
| Aw9CM  | 97.83784 | C8CM  | 99.72973 |
| Aw9MuF | 99.72973 | C8MuF | 97.02703 |
| Aw9MuH | 97.56757 | C8MuH | 98.91892 |
| Aw9MuM | 98.91892 | C9CH  | 97.83784 |
| C10CF  | 98.37838 | C9CM  | 98.37838 |
| C10CH  | 99.45946 | C9MuM | 98.10811 |
| C10CM  | 97.56757 |       |          |

---
